# Supplementary material
Source: publisher figshare collection journal article supplement (https://karger.figshare.com/ndownloader/files/28529073)
Supplement: Supplementary file 1 [file 28529073]

Legends

Supplementary Figure 1. VOCAL analysis for evaluating the volume of BE
